# Supplementary material for: Machine Learning Approach to Predict Physical Properties of Polypropylene Composites: Application of MLR, DNN, and Random Forest to Industrial Data
Source: MDPI journal article supplement (doi:10.3390/polym14173500), 2022-08-26
Supplement: s1 [file s1]

## SUPPLEMENTARY MATERIAL

### Machine Learning Approach to Predict Physical Properties of Polypropylene Composites:

#### Application of MLR, DNN, and Random Forest to Industrial Data

Chonghyo Joo <sup>1,2,†</sup>, Hyundo Park <sup>1,2,†</sup>, Hyukwon Kwon <sup>1,2</sup>, Jongkoo Lim <sup>3</sup>, Eunchul Shin <sup>3</sup>, Hyungtae Cho <sup>1</sup> and Junghwan Kim <sup>1,\*</sup>

<sup>1</sup> *Green Materials and Processes R&D Group, Korea Institute of Industrial Technology, 55, Jongga-ro, Jung-gu, 44413 Ulsan, Korea*

<sup>2</sup> *Department of Chemical and Biomolecular Engineering, Yonsei University, 50, Yonsei-ro, Seodaemun-gu, 03722 Seoul, Korea*

<sup>3</sup> *Research & Development Center, GS Caltex Corporation, 359, Expo-ro, Yuseon-gu, 34122 Daejeon, Korea*

<sup>†</sup> **Co-first authors: These authors contributed equally to this work.**

**\*Corresponding author**

Junghwan Kim

E-mail: kjh31@kitech.re.kr

**Table S1.** Pseudo code of categorization

---

|                                                                                                                |                                                                          |                                                                 |
|----------------------------------------------------------------------------------------------------------------|--------------------------------------------------------------------------|-----------------------------------------------------------------|
| <b>Algorithm:</b> Categorization                                                                               |                                                                          |                                                                 |
| <hr/>                                                                                                          |                                                                          |                                                                 |
| <b>Input:</b> $\mathcal{M}$ : $n \times d$ recipe dataset, $n$ : Number of recipes, $d$ : Number of materials. |                                                                          |                                                                 |
| <b>Output:</b> $\mathcal{C}$ : Category set.                                                                   |                                                                          |                                                                 |
| <hr/>                                                                                                          |                                                                          |                                                                 |
| 1:                                                                                                             | Binning process                                                          |                                                                 |
| 2:                                                                                                             | <b>for each</b> $u \in \mathcal{M}$ <b>do</b>                            |                                                                 |
| 3:                                                                                                             | <b>if</b> $u > 0$ //                                                     | If $u$ is bigger than zero, replace the value of $u$ with “T.”  |
| 4:                                                                                                             | replace $u$ value with “T”                                               |                                                                 |
| 5:                                                                                                             | <b>if</b> $u = 0$ //                                                     | If $u$ is zero, replace the value of $u$ with “F.”              |
| 6:                                                                                                             | replace $u$ value with “F”                                               |                                                                 |
| 7:                                                                                                             | <b>end</b>                                                               |                                                                 |
| 8:                                                                                                             | $\mathcal{M} \rightarrow \mathcal{M}'$ //                                | Recipe dataset replaced with “T” and “F” after binning process. |
| 9:                                                                                                             | Categorization process                                                   |                                                                 |
| 10:                                                                                                            | <b>for each</b> $u \in \mathcal{M}'$ <b>do</b>                           |                                                                 |
| 11:                                                                                                            | arrange $u$ from $u(n, 1)$ to $u(n, d)$ //                               | Make code $a$ consisting of “T” and “F.”                        |
| 12:                                                                                                            | give the arranged code $a$ to data point $(n, )$ //                      | Give code $a$ to each recipe.                                   |
| 13:                                                                                                            | <b>for each</b> code $a \in \mathcal{M}'$ <b>do</b>                      |                                                                 |
| 14:                                                                                                            | <b>for each</b> code $b \in \mathcal{M}' \setminus u$ <b>do</b>          |                                                                 |
| 15:                                                                                                            | <b>if</b> $a = b$ //                                                     | If $a$ and $b$ are same, add the recipes to the same category   |
| 16:                                                                                                            | add $(a, b)$ pair to the same category in the category set $\mathcal{C}$ |                                                                 |
| 16:                                                                                                            | <b>Return</b> $\mathcal{C}$                                              |                                                                 |

---
